# Supplementary material
Source: publisher figshare collection journal article supplement (https://tandf.figshare.com/articles/dataset/_/7007231)

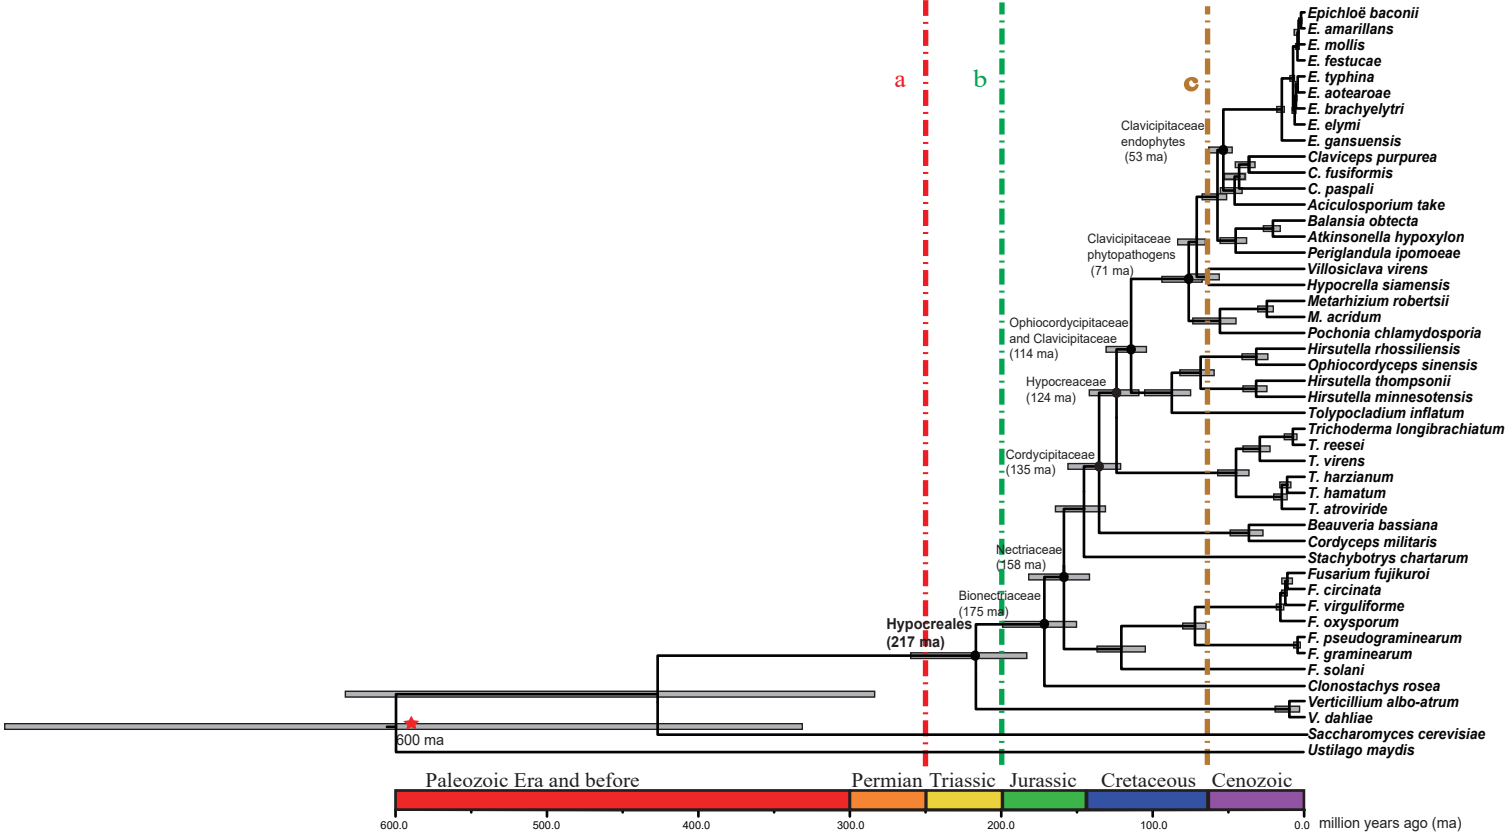

Supplement: Supplementary file 1 [file 1]

Plant pathogen  
 Animal pathogen  
 Fungal pathogen  
 Saprobe

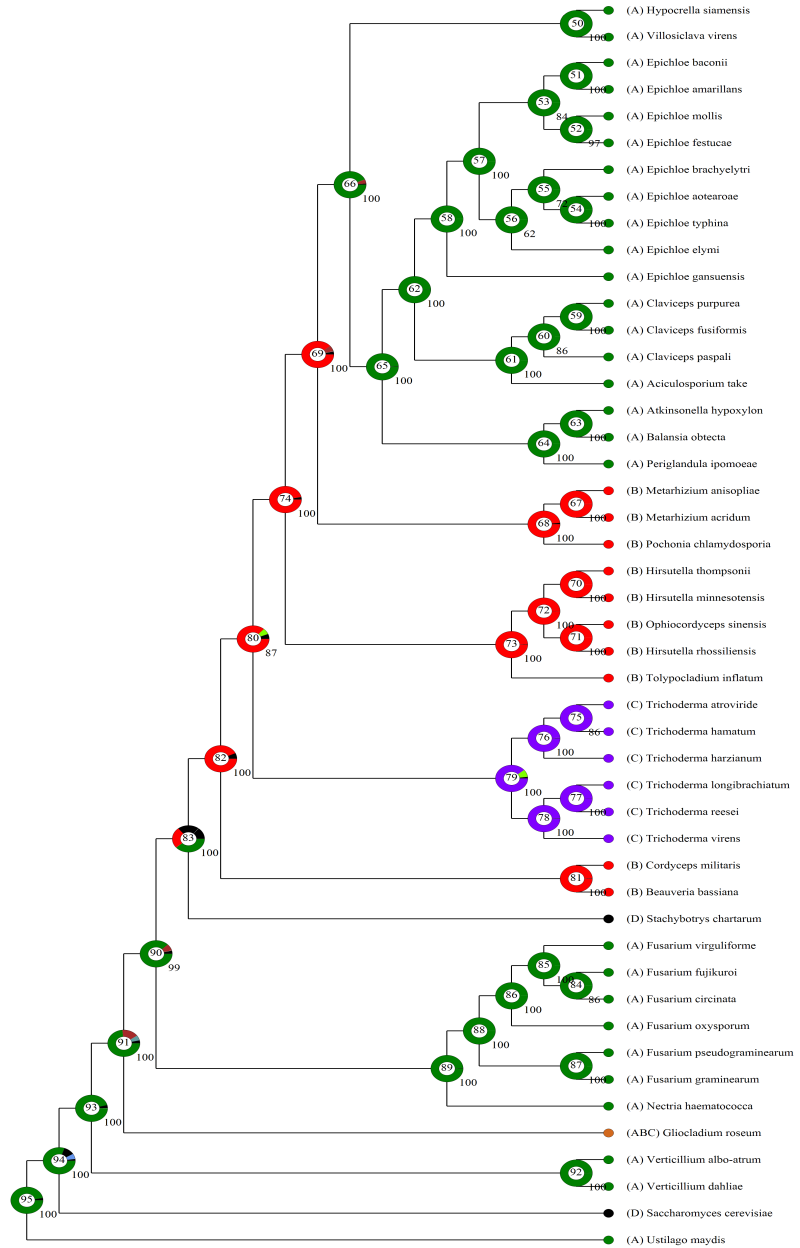

Supplement: Supplementary file 2 [file 1]
